# Supplementary material
Source: publisher site journal article supplement (https://www.dovepress.com/get_supplementary_file.php?f=371934.docx)

HA-DOPE Modified Honokiol-Loaded liposomes Targeted Therapy for Osteosarcoma

Xiangxiang Zhang1, Huaen Chen1, Yang Zhang1, Qijing Huang1, Jianjia Feng1, Haoyu Xing1, Xiaguo Fu1, Xiufang Yan1, Yingying Zhang1, Qin Xu1, Jianming Liang1

1 Artemisinin Research Center, The First Affiliated Hospital, Guangzhou University of Chinese Medicine, Guangzhou, 510405,People’s Republic of China

Correspondence: Jianming Liang, Artemisinin Research Center, The First Affiliated Hospital, Guangzhou University of Chinese Medicine, Guangzhou, 510405,People’s Republic of China, Email [liangjianming@gzucm.edu.cn](mailto:liangjianming@gzucm.edu.cn)

Supplementary Figure

Figure S1 FT-IR spectra of hyaluronic acid (HA), dioleoyl phosphoethanolamine (DOPE), and HA-conjugated DOPE (HA-DOPE).


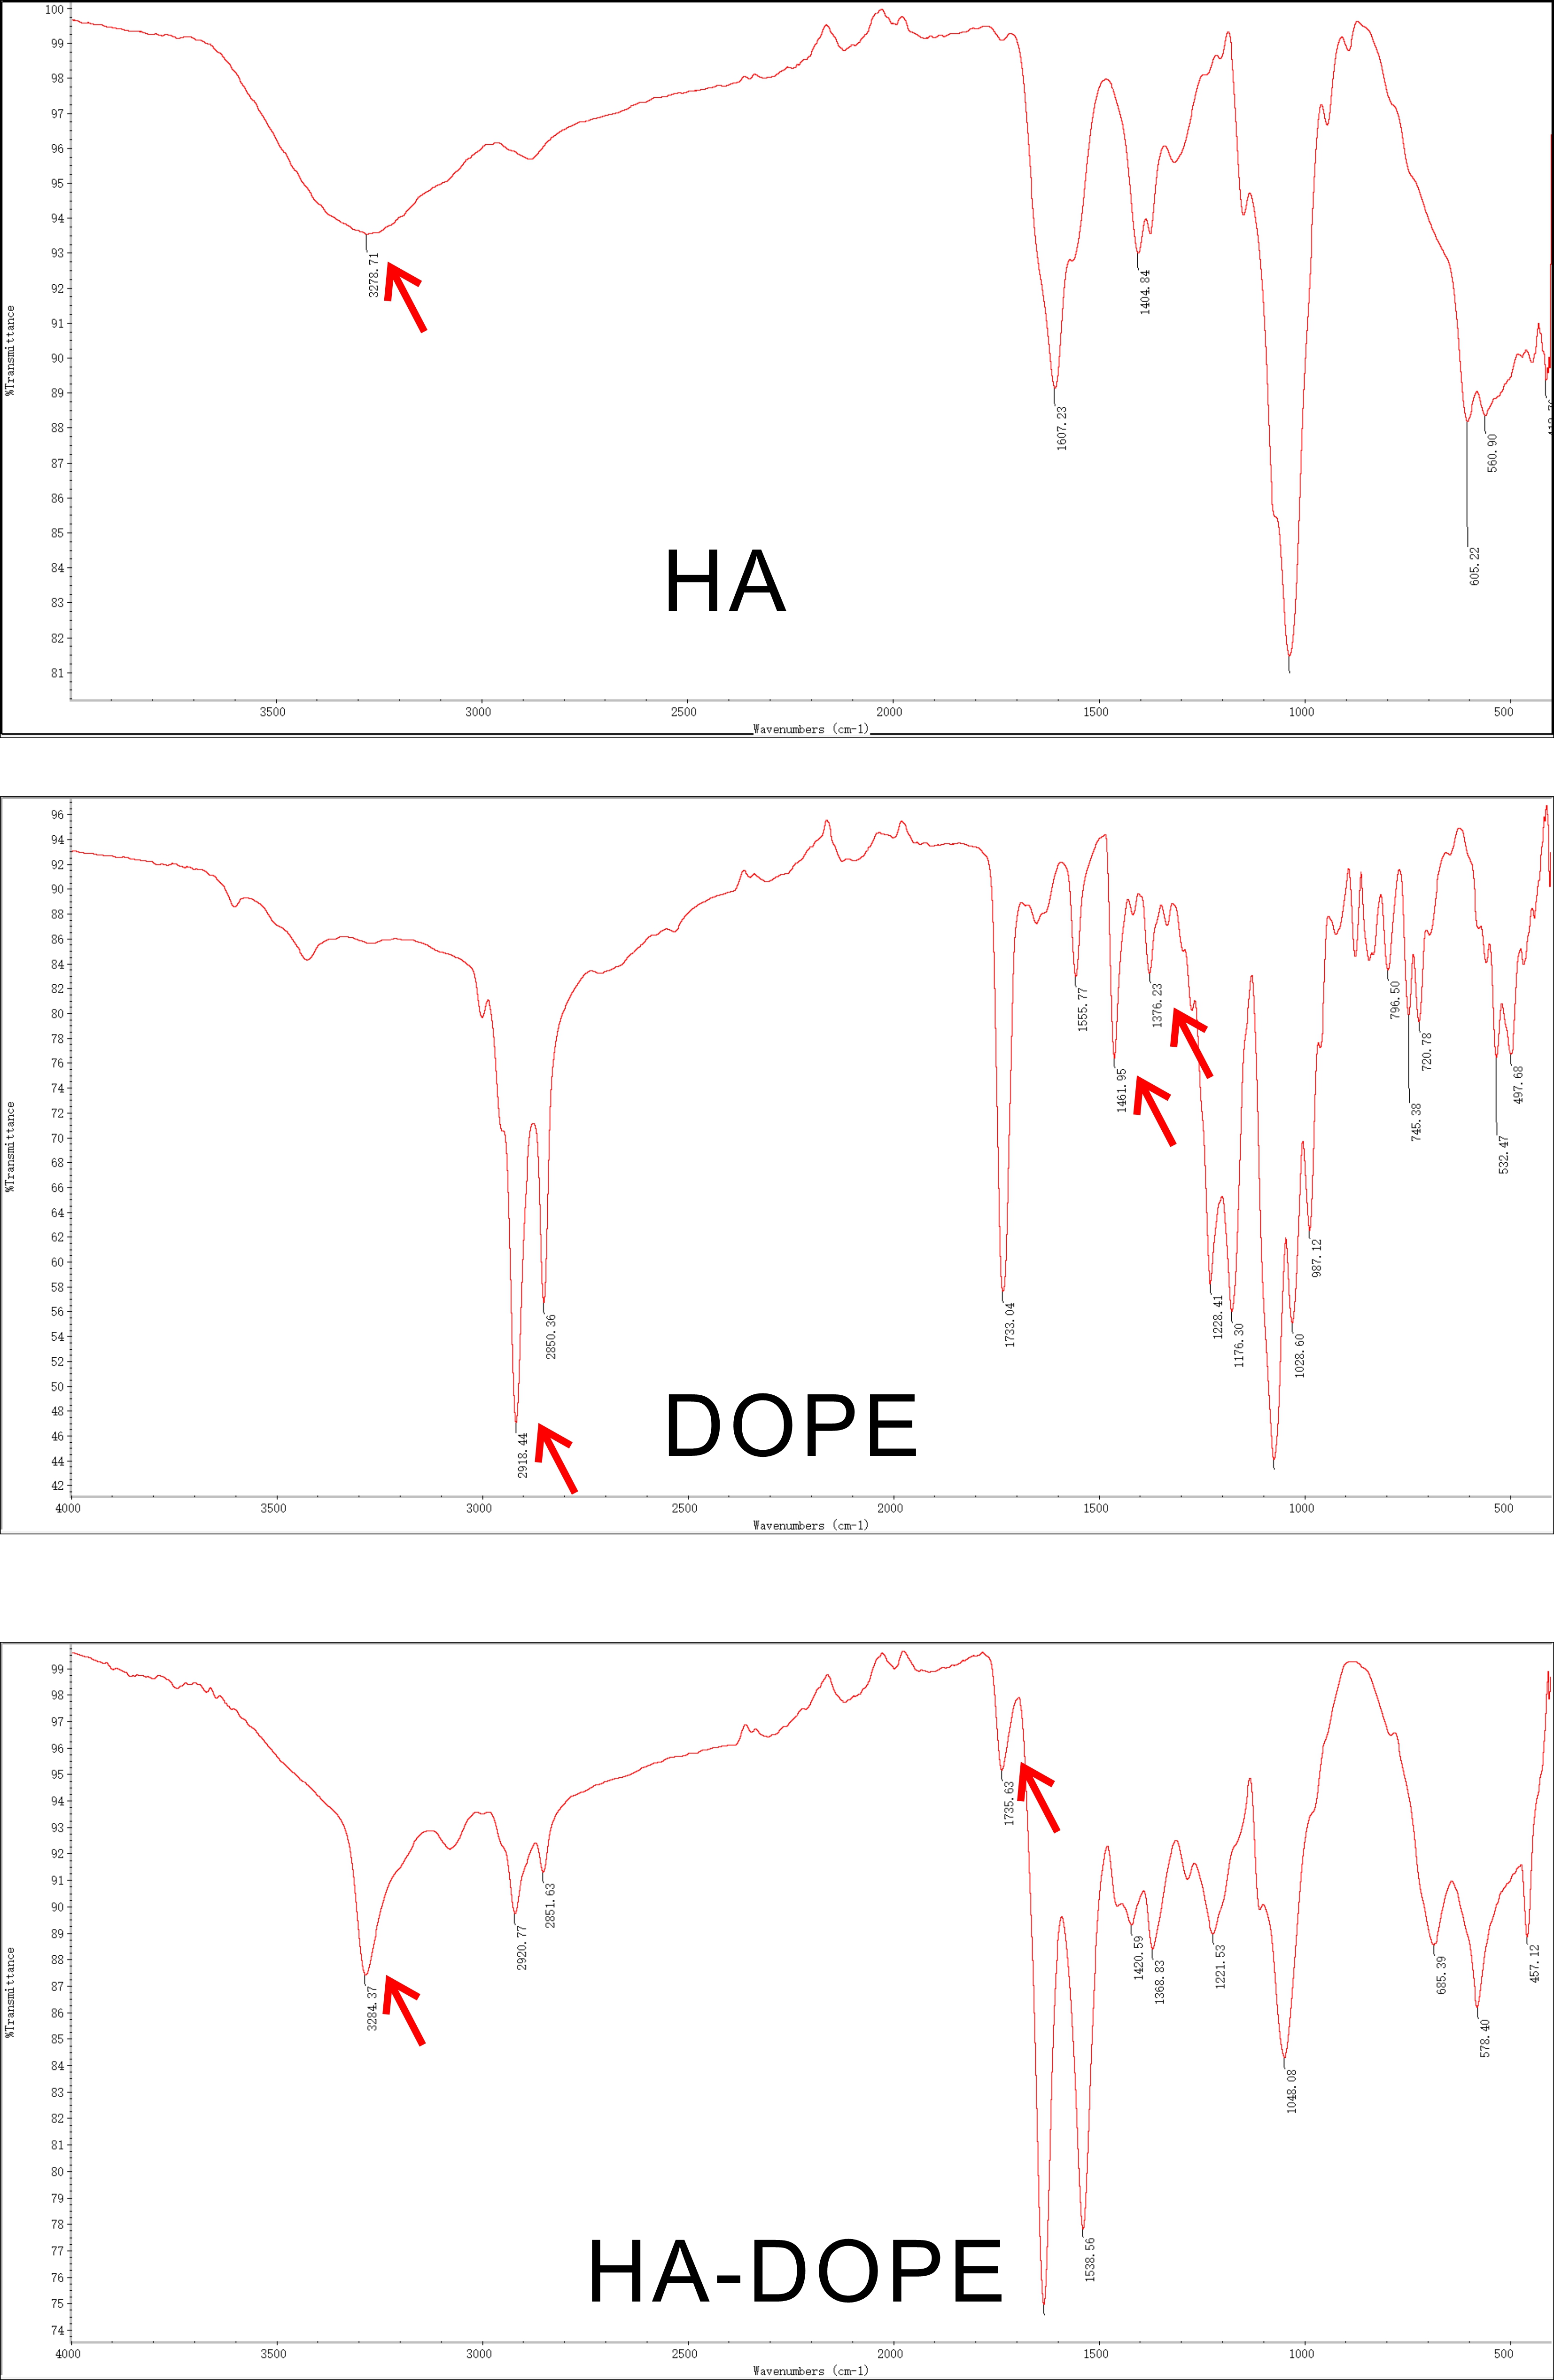


HA and HA-DOPE were identified by HPLC. Briefly, BioCore SEC column was used for identifying the HA conjugated DOPE, and the composition of the mobile phase was 0.1M phosphate buffered saline (pH=7.0): methanol (80:20, v/v), the flow rate was 1.0 mL/min, and the detection wavelength was 214 nm, the BioCore SEC Column temperature was set at 30°C.

Figure S2 High Performance Liquid Chromatograms of (A) HA and (B) HA-DOPE.

A


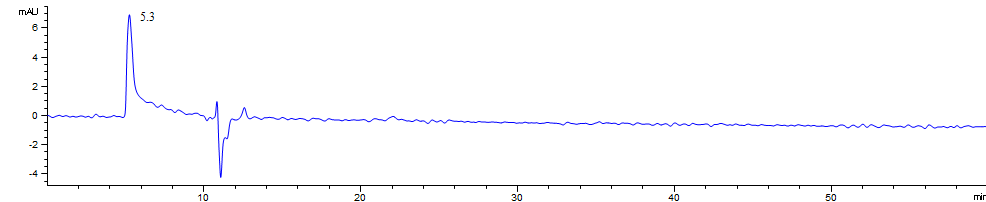


HA

B


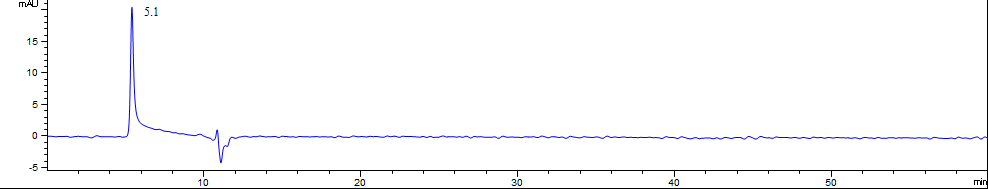


HA-DOPE

Figure S3 FT-IR spectra of (A) HNK, (B) blank liposomes, (C) physical mixture (SPC, CHO, HA-DOPE and HNK) and (D) HA-DOPE@Lips/HNK.


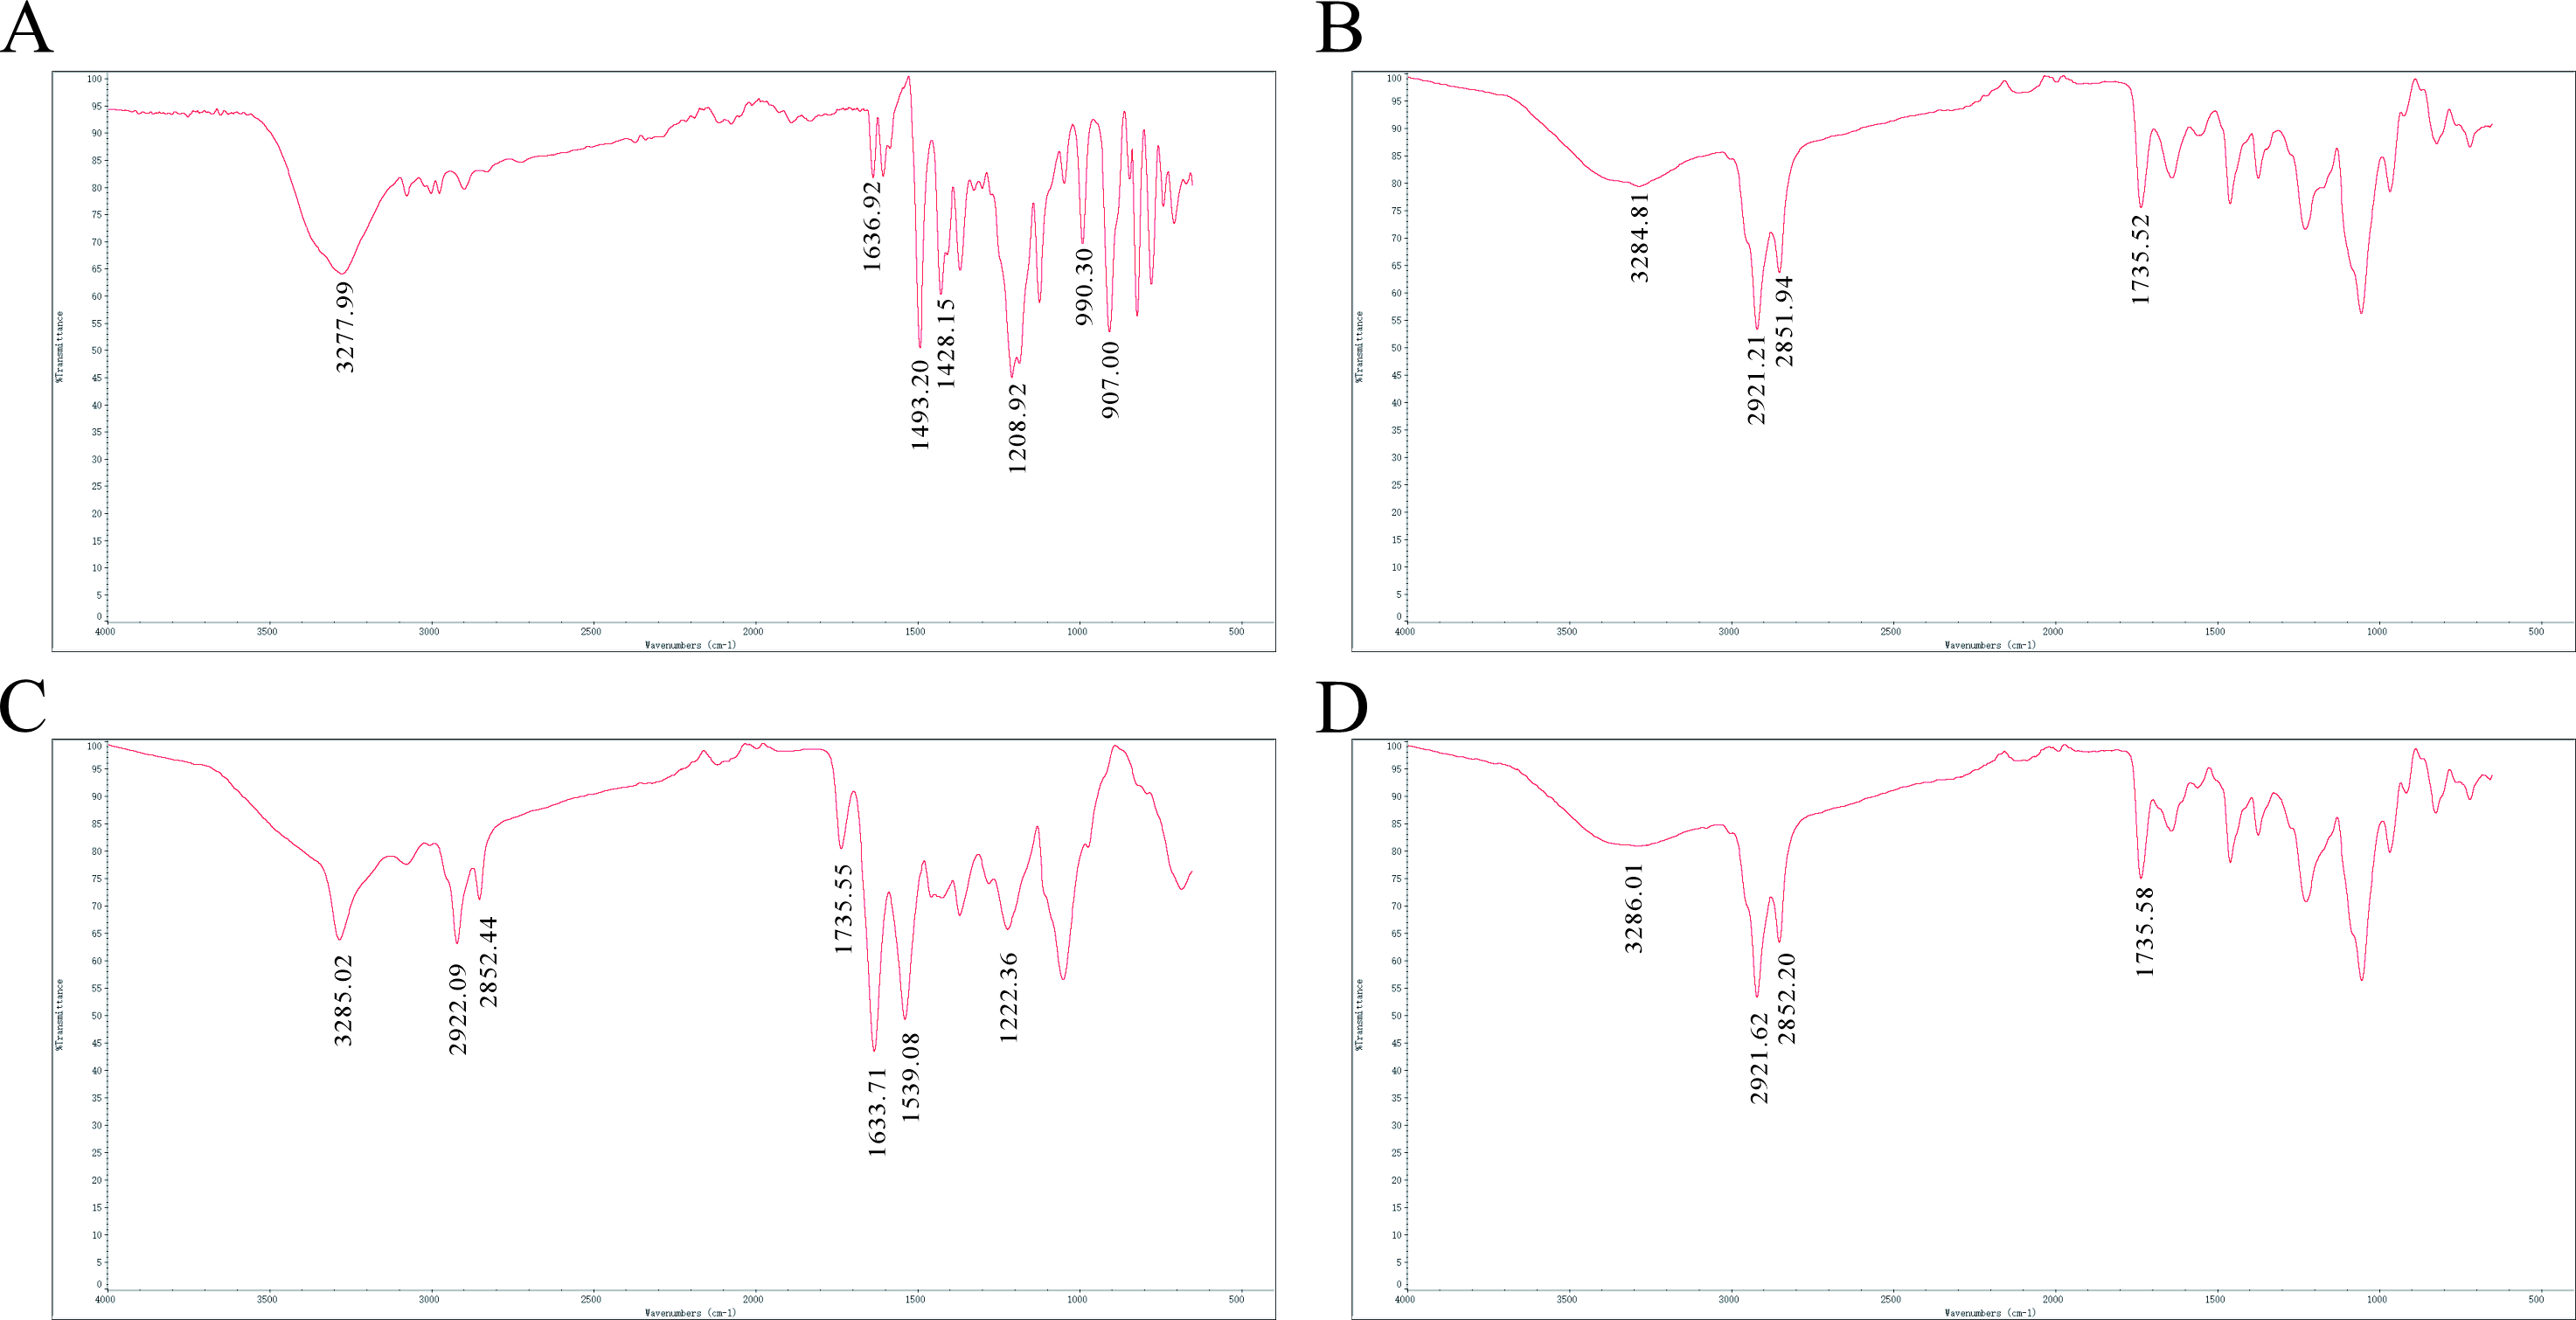

Supplement: Supplementary file 1 [file get_supplementary_file.php]
